# Supplementary material for: The enigma of the near-symmetry of proteins: Domain swapping
Source: PubMed Central journal article supplement (PMC5510828; doi:10.1371/journal.pone.0180030), 2017-07-14
Supplement: pone.0180030.s001.pdf [file pone.0180030.s001.pdf]

# The enigma of the near-symmetry of proteins: Domain swapping

Maayan Bonjack-Shterengartz David Avnir

Institute of Chemistry and the Lise Meitner Minerva Center for Computational Quantum Chemistry, The Hebrew University of Jerusalem, Jerusalem 91904, Israel

## Supporting Information

### **S1 Appendix. Further explanation about the hinge symmetry probability analysis**

We answer the question 'what is the probability that *at least*  $x$  amino-acids out of the  $d$  most distorted amino-acids appear in a given  $h$ -length-segment?'. In our application,  $x$  is the number of most distorted amino acids found experimentally in the hinge region of length  $h$ . For that purpose we first answer the question 'what is the probability that *exactly*  $x$  pairs out of the  $d$  most distorted amino-acids appear in a given  $h$ -length-segment?'

Let us demonstrate the answers and the relevant equations with a specific example, taking a dimeric protein, composed of two monomers, each of 7-amino acids ( $N = 7$ ). Let us assume the following: A. The length of the hinge region is 3 amino acids ( $h = 3$ ) and it is placed as a sequence at locations 2,3,4 (S1 Fig, the bar). B. We have a list of the  $d$  most distorted amino acids so that  $d = h = 3$  (orange in S1 Fig). C. The experimental observation is that  $x = 2$  out of the  $d = 3$  most distorted amino-acids are located in the hinge; *what is the probability of that to happen?*

There are  $\binom{N}{d} = \binom{7}{3} = 35$  ways of placing the 3 most-distorted amino-acids in the set of  $N = 7$  amino-acids, all of which are shown in Fig. S1. In each of these 35 ways there appear in the hinge region 0-3 amino acids out of the 3 most distorted amino-acids ( $r = 0, 1, \dots, h$ ). What then is the probability that *exactly*  $x$  ( $r = 2$ ) amino acids out of the 3 most distorted amino-acids will appear in the hinge? Direct counting of these cases in the figure show that there are 12 possibilities of having two oranges in the hinge, obeying:

$$(1) \quad \binom{h}{x} \cdot \binom{N-h}{d-x}$$

Here,  $\binom{h}{x}$  is the number of ways of placing  $x$  most-distorted amino-acids in the hinge region, and  $\binom{N-h}{d-x}$  is the number of ways of placing the  $d-x$  most-distorted amino-acids outside of the hinge region.

Therefore the probability of that to happen is  $\frac{12}{35} = 34\%$  , obeying

$$(2) \quad P(r) = \frac{\binom{h}{r} \binom{N-h}{d-r}}{\binom{N}{d}}$$

Our next step is to ask 'what is the probability that *at least 2* amino-acids out of the 3 most distorted amino-acids will in the hinge?'. In our example, only  $x = 3$  is relevant, and there is only one additional option for that (top line in the figure). That number is obtained from eq. 1, and its probability 3% is obtained from eq. 2. Therefore the answer for the “at least” question is a probability of 37%, obtained from

$$(3) \quad P = \sum_{r=x}^h P(r)$$
