# Supplementary material for: The enigma of the near-symmetry of proteins: Domain swapping
Source: PubMed Central journal article supplement (PMC5510828; doi:10.1371/journal.pone.0180030), 2017-07-14

# The enigma of the near-symmetry of proteins: Domain swapping

Maayan Bonjack-Shterengartz David Avnir

Institute of Chemistry and the Lise Meitner Minerva Center for Computational Quantum  
Chemistry, The Hebrew University of Jerusalem, Jerusalem 91904, Israel

## Supporting Information

**S1 Fig. Visual explanation of the probability calculation for the question 'what is the probability that at least  $x$  amino-acids out of the  $d$  most distorted amino-acids appear in a given  $h$ -length-segment?'. The assumptions:**

(a)  $N = 7$ , namely, a dimeric protein composed of two subunits, each of 7-amino acids (a row of circles). (b)  $h = 3$ . The length of the hinge region is 3 amino acids and it placed as a sequence of at locations 2,3,4 (indicated by the bar); (c)  $d = h = 3$ . There is a list of the 3 most distorted amino acids (orange circles); (d) The experimental observation is that 2 out of the  $d = 3$  most distorted amino-acids are located in the hinge. There are  $\binom{N}{d} = 35$  ways of placing the 3 most-distorted amino-acids in the set of 7 amino-acids; in each of these ways, the hinge region contains 0-3 amino acids out of the 3 most distorted amino-acids ( $r = 0,1,2,3$ ).

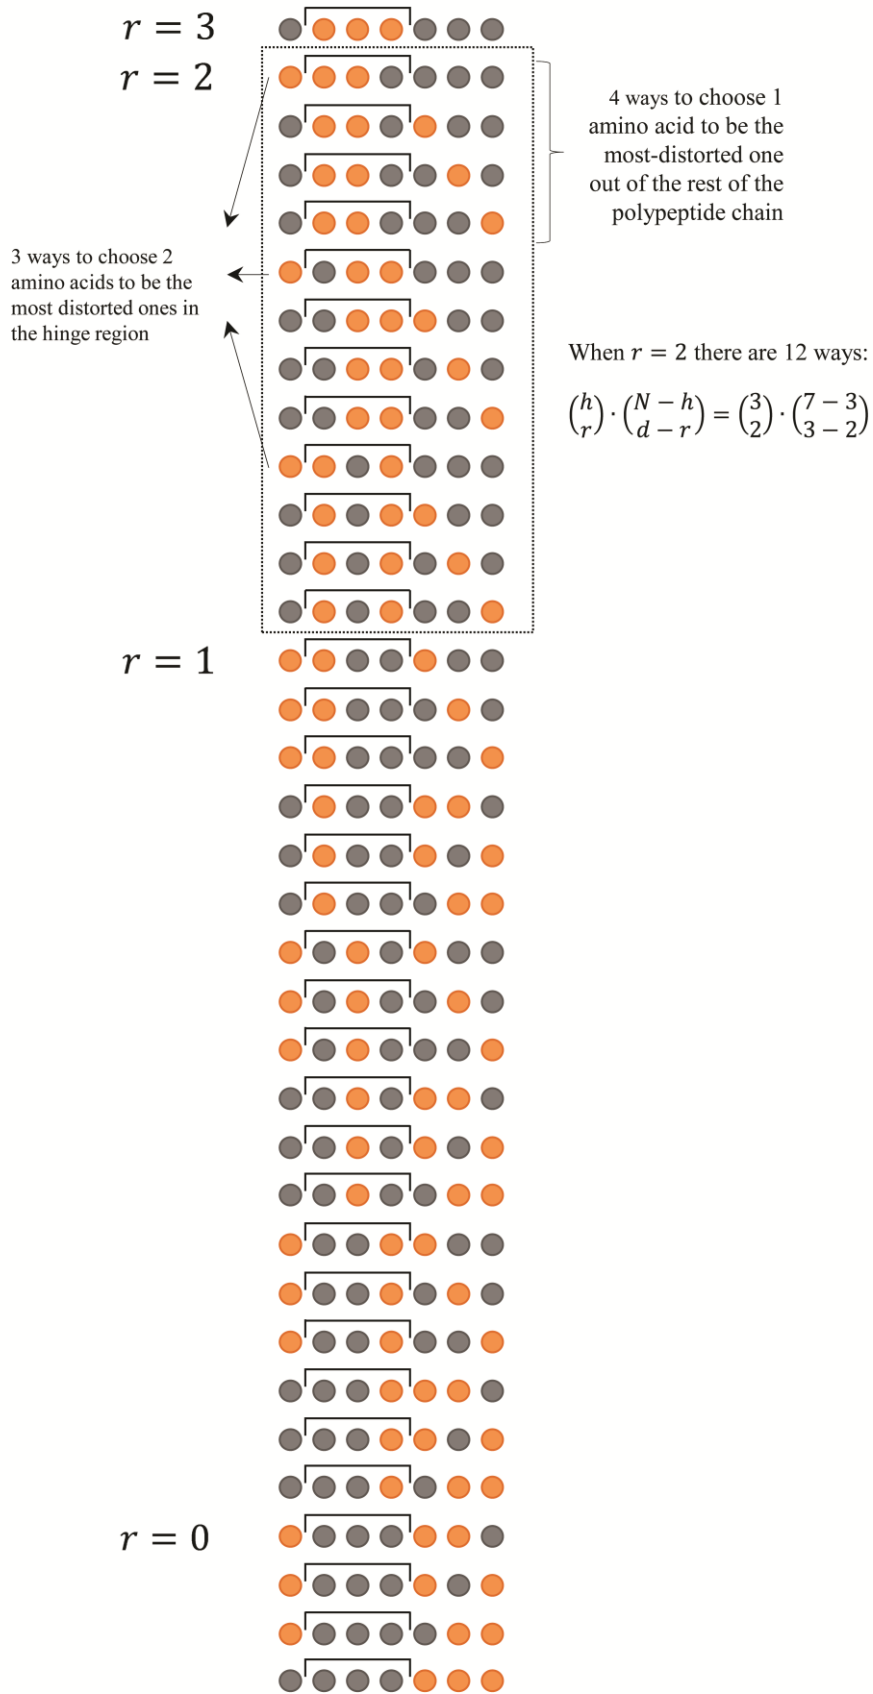

Supplement: pone.0180030.s002.pdf [file pone.0180030.s002.pdf]
